# Supplementary material for: Chronic lymphocytic leukemia requires BCL2 to sequester prodeath BIM, explaining sensitivity to BCL2 antagonist ABT-737
Source: JCI journal article supplement (doi:10.1172/jci28281), 2007-01-02
Supplement: sd1 [file 1]

Supplemental Table 1

| Patient | EC50 ABT-737 (nM) | EC50 NCE (nM) | Age | Rai Stage | WBC (x10E-3/ul) | CD38 | LDH (313-618) | beta-2 (0-2.7) | treatment history | IgVH status |
|---------|-------------------|---------------|-----|-----------|-----------------|------|---------------|----------------|-------------------|-------------|
| V1      | 7.0               | 1114          | 74  | 2         | 282             | nd   | 918           | 4.1            | untreated         | nd          |
| V2      | 3.2               | 473           | 75  | 1         | 72.5            | nd   | 537           | 3.7            | untreated         | mut         |
| V3      | 3.5               | 502           | 63  | 3         | 89.4            | neg  | 2138          | 2.5            | untreated         | un          |
| V4      | 3.6               | 496           | 67  | 1         | 184.6           | nd   | 563           | 5.5            | C; R              | mut         |
| V5      | 2.1               | 539           | 62  | 2         | 81.2            | nd   | 431           | 5.3            | untreated         | mut         |
| V6      | 3.1               | 493           | 65  | 2         | 126             | neg  | 533           | 4.5            | F; F+Cy; R        | mut         |
| V7      | 1.9               | 1783          | 58  | 2         | 47.1            | nd   | 444           | 1.7            | untreated         | nd          |
| V8      | 4.1               | 500           | 48  | 2         | 208.4           | nd   | 398           | 3              | untreated         | mut         |
| V9      | 8.7               | 1009          | 76  | 1         | 108.3           | nd   | 434           | 2.6            | untreated         | un          |
| V10     | 5.8               | 630           | 55  | 1         | 68.3            | pos  | 613           | 3.2            | untreated         | un          |
| V11     | 3.1               | 334           | 67  | 1         | 86.3            | nd   | 501           | 1.9            | untreated         | nd          |
| V12     | 8.0               | 579           | 74  | 2         | 257.1           | nd   | 473           | 3.2            | untreated         | mut         |
| V13     | 4.6               | 683           | 41  | 1         | 307.9           | pos  | 1310          | 5.3            | untreated         | un          |
| V14     | 3.3               | 318           | 59  | 2         | 233.9           | neg  | 463           | 1.8            | untreated         | mut         |
| V15     | 6.4               | 582           | 63  | 3         | 201.8           | nd   | 431           | 3.2            | untreated         | un          |
| V16     | 2.9               | 343           | 60  | 1         | 72.2            | nd   | 444           | 1.9            | untreated         | mut         |
| V17     | 9.4               | 861           | 47  | 3         | 244.1           | nd   | 424           | 2.6            | untreated         | mut         |
| V18     | 2.3               | 387           | 46  | 1         | 89.9            | nd   | 450           | 2              | untreated         | mut         |
| V19     | 6.4               | 572           | 55  | 1         | 162             | nd   | 185           | 2.7            | untreated         | mut         |
| V20     | 4.8               | 119           | 66  | 3         | 502             | neg  | 663           | 5.3            | S; C; F; R        | mut         |
| V21     | 2.1               | 295           | 68  | 1         | 107.9           | nd   | 647           | 3.5            | untreated         | mut         |
| V22     | 4.0               | 330           | 62  | 3         | 343             | nd   | 583           | 4.3            | untreated         | mut         |
| V23     | 2.4               | 239           | 64  | 2         | 140.5           | nd   | 458           | 2.4            | untreated         | mut         |
| V24     | 5.1               | 585           | 55  | 1         | 55              | pos  | 503           | 2.6            | untreated         | mut         |

nd = not determined

C= chlorambucil  
R= rituximab  
F= fludarabine  
Cy= cyclophosphamide  
S= splenectomy

**A**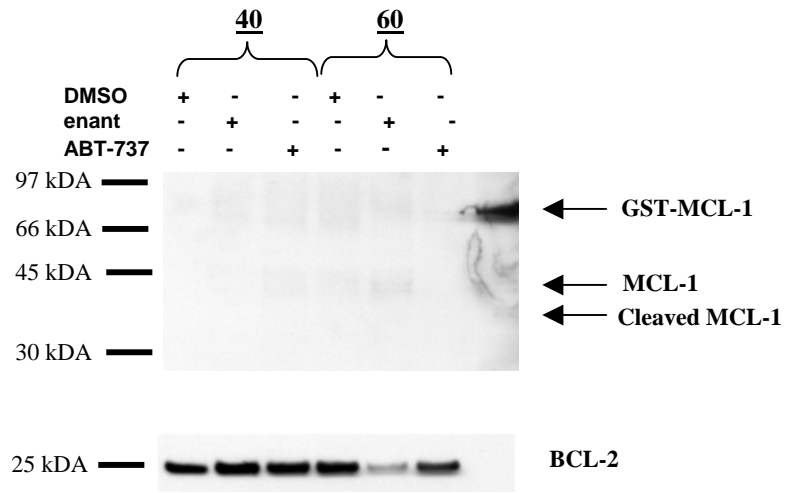**B**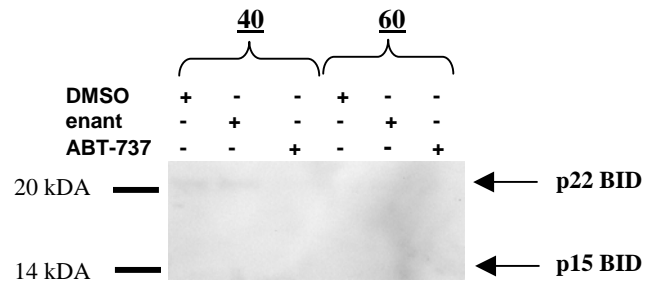**C**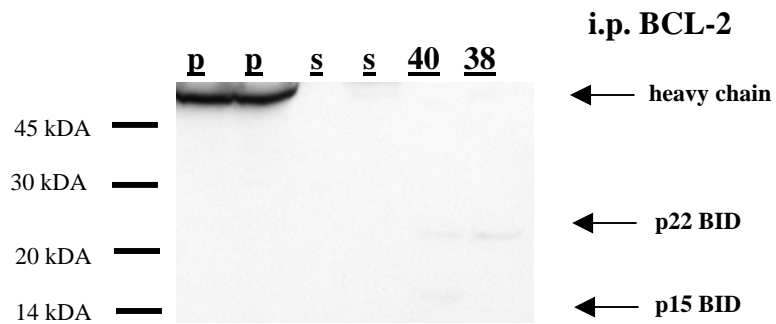

### **Supplemental Table 1**

Patient characteristics. Tabulated are clinical characteristics of patients contributing samples to Figure 1A. For cytogenetics, samples were tested, unless otherwise marked, for del 13q, trisomy 12, del 11q and del 17 p by FISH. Other cytogenetic abnormalities were obtained by standard metaphase cytogenetics, not routinely performed on all samples. CD38 surface staining was determined by FACS analysis in a subset of samples.

### **Supplemental Figure 1**

Neither MCL-1 nor BID are present in significant amounts before or after ABT-737 treatment in CLL cells. (A and B) Primary CLL cells were cultured for 24 hours with ABT-737 (100nM), negative control enantiomer (enant, 100nM), or vehicle (DMSO, 1%). Cells were lysed in CHAPS buffer and lysates (15µg) were subjected to Western blot using antibodies to (A) full length and cleaved MCL-1 or (B) p22 and caspase-8 cleaved tBID. (C) Whole cell lysates of independent CLL samples (50µg) were subjected to immunoprecipitation with an antibody recognizing BCL-2. Lysate input (sample number), immunoprecipitation pellet (p) and proteins remaining in the supernatant (s) were loaded for comparison. Immunoblot is against full-length p22 BID or caspase-8 cleaved p15 tBID. Same blot was probed for BIM in Figure 5B. Numbers at top of blots represent patient sample numbers.

## Supplemental Methods

*Peptides.* Peptides were synthesized by Tufts University Core Facility and purified by HPLC. Identity was confirmed by mass spectrometry. Stock solutions were made in DMSO. Sequences were taken from published sequences of BAD(LWAAQRYGRELRRMSDEFEGSFKGL) (s1), BADmu (LWAAQRYGREARRMSDEFEGSFKGL, note L-> A, a point mutation abrogating binding to BCL-2) (s2), NOXA A (AELPPEFAAQLRKIGDKVYC) (s3), BMF (HQAEVQIARKLQLIADQFHR) (s4) BID(EDIIRNIARHLAQVGDSMDR) (s5), BIM (MRPEIWIAQELRRIGDEFNA) (s6), BIK(MEGSDALALRLACIGDEMDV) (s7), BNIP3- $\alpha$  (VVEGEKEVEALKKSADWVSD) (s8), HRK (SSAAQLTAARLKALGDELHQ) (s9) and PUMA (EQWAREIGAQLRRMADDLNA) (s10).

*Multiple Myeloma Cell culture.* LP1 and L363 cells (kind gift from Ruben Carrasco) were cultured in Iscove's modified Dulbecco's medium with 10% fetal bovine serum.

*Cytochrome c release.* Mitochondria were purified from freshly isolated CLL cells and cell lines by mechanical disruption followed by differential centrifugation, as previously described (s11). Mitochondrial suspensions were made at 0.5 mg protein/ml, except for the case of ABT-737 and negative control enantiomer treatments, where 0.1 mg/ml was used. Release of cytochrome *c* was determined by a comparison of cytochrome *c* in the pellet and supernatant quantitated by ELISA (R&D systems).

*Immunoblots.* CLL protein lysates were obtained by cell lysis in Triton-X100 (142.5 mM NaCl, 5mM MgCl<sub>2</sub>, 10 mM HEPES, 1 mM EGTA, 0.1% Triton-X100 (Sigma)), RIPA (150 mM NaCl, 2 mM EDTA, 0.1 M Na<sub>2</sub>HPO<sub>4</sub> pH 7.2, 0.2 mM NaVO<sub>4</sub>, 50 mM NaF, 1% sodium deoxycholate, 0.1% SDS, and 1% NP-40(Sigma)) or CHAPS (100 mM NaCl, 5 mM NaPO<sub>4</sub>, 2.5 mM EDTA, 1% CHAPS (Sigma)) buffer supplemented with a Complete protease inhibitor cocktail tablet (Roche). C-terminal truncated GST-tagged MCL-1 and BCL-2 were prepared from bacterial lysates as previously described (s12). His-tagged caspase 8 cleaved recombinant human BID (Pharmaceutical Research Institutes S.A.) was a generous gift from Claudio Hetz (Harvard School of Public Health). The DHL4 large diffuse B cell line was a generous gift from Dr. Shipp (DFCI) and protein lysates were prepared the same as CLL lysates above. Protein samples were electrophoretically separated on NuPAGE 10% Bis-Tris polyacrylamide gels (Invitrogen). Antibodies were used to detect the following proteins on membrane: BIM (Calbiochem 22-40 or Abgent BH3 domain); BCL-2 (Pharmingen, /100); MCL-1 (Chemicon, RC-13 or Santa Cruz, S-19); BID (Santa Cruz, FL-195).

*Immunoprecipitation.* Cell lysates were incubated with 6C8 hamster anti-human BCL-2 antibody (3 µg) or BIM antibody (3 µg) for at least 1 hour at 4°C in CHAPS buffer. Protein A-sepharose beads (Sigma) were added to precipitate complexes containing BCL-2 or BIM. Proteins complexed to the beads were separated from protein remaining in the supernatant by centrifugation and the fractions mixed with loading buffer prior to loading supernatant onto a 10% Bis-Tris polyacrylamide gel (Invitrogen) for analysis. For displacement reactions, 50µg of

lysate were incubated with 3 $\mu$ g 6C8 BCL-2 antibody for at least 1 hour at 4°C in 0.1% Triton-X100 buffer or CHAPS buffer. Protein A-sepharose beads were added and incubated for 1 hour. Then the beads were pelleted and washed 3 times and resuspended in HE buffer (1 mM EDTA and 10 mM HEPES, pH 7.4, as in (s13)). 1 $\mu$ M ABT-737, 1 $\mu$ M negative control enantiomer, or DMSO was added to the tube, incubated overnight; the supernatant was loaded onto a 10% Bis-Tris polyacrylamide gel for analysis.

*Western blot protein quantification.* Densitometry of protein bands were acquired using an Alphamager EC gel documentation system (Alpha Innotec, Germany) and bands analyzed with the spot densitometry analysis tool (Alpha Ease FC software, version, 4.1.0). Quantities of relative BCL-2 and MCL-1 per CLL sample were obtained by using the densitometry of the GST standards to create a standard curve. The values of the CLL lysate bands were then used with the equation of the standard curve line to calculate a protein concentration. shRNA values were obtained by dividing either individual BIM isoform values or total BIM value by the corresponding actin value.

*Subcellular Fractionation.* Primary CLL cells from two independent patient samples were fractionated as previously described (s14). Equal amounts of protein from each fraction were loaded onto a NuPAGE 10% Bis-Tris polyacrylamide gel based on a Bio-Rad Protein Assay. Antibodies to verify the contents of the different fractions were as follows: heavy membrane, MnSOD (Stressgen, SOD-111); light membrane, BiP (BD Biosciences, 610978); and S100, Glucose 6 Phosphate Dehydrogenase (Abcam, ab 993).

## Supplemental References

- s1. Kelekar, A., Chang, B.S., Harlan, J.E., Fesik, S.W., and Thompson, C.B. 1997. Bad is a BH3 domain-containing protein that forms an inactivating dimer with Bcl-XL. *Mol. Cell. Biol.* **17**:7040–7046.
- s2. Zha, J., et al. 1997. BH3 domain of BAD is required for heterodimerization with BCL-XL and pro-apoptotic activity. *J. Biol. Chem.* **272**:24101–24104.
- s3. Oda, E., et al. 2000. Noxa, a BH3-only member of the Bcl-2 family and candidate mediator of p53-induced apoptosis. *Science.* **288**:1053–1058.
- s4. Puthalakath, H., et al. 2001. Bmf: a proapoptotic BH3-only protein regulated by interaction with the myosin V actin motor complex, activated by anoikis. *Science.* **293**:1829–1832.
- s5. Wang, K., Yin, X.M., Chao, D.T., Milliman, C.L., and Korsmeyer, S.J. 1996. BID: a novel BH3 domain-only death agonist. *Genes Dev.* **10**:2859–2869.
- s6. O'Connor, L., et al. 1998. Bim: a novel member of the Bcl-2 family that promotes apoptosis. *EMBO J.* **17**:384–395.
- s7. Boyd, J.M., et al. 1995. Bik, a novel death-inducing protein shares a distinct sequence motif with Bcl-2 family proteins and interacts with viral and cellular survival-promoting proteins. *Oncogene.* **11**:1921–1928.
- s8. Yasuda, M., Han, J.W., Dionne, C.A., Boyd, J.M., and Chinnadurai, G. 1999. BNIP3alpha: a human homolog of mitochondrial proapoptotic protein BNIP3. *Cancer Res.* **59**:533–537.
- s9. Inohara, N., Ding, L., Chen, S., and Nunez, G. 1997. harakiri, a novel regulator of cell death, encodes a protein that activates apoptosis and interacts selectively with survival-promoting proteins Bcl-2 and Bcl-X(L). *EMBO J.* **16**:1686–1694.
- s10. Nakano, K., and Vousden, K.H. 2001. PUMA, a novel proapoptotic gene, is induced by p53. *Mol. Cell.* **7**:683–694.
- s11. Letai, A., Bassik, M.C., Walensky, L.D., Sorcinelli, M.D., Weiler, S., and Korsmeyer, S.J. 2002. Distinct BH3 domains either sensitize or activate

- mitochondrial apoptosis, serving as prototype cancer therapeutics. *Cancer Cell* 2:183-192.
- s12. Certo, M., Del Gaizo Moore, V., Nishino, M., Wei, G., Korsmeyer, S., Armstrong, S.A., and Letai, A. 2006. Mitochondria primed by death signals determine cellular addiction to antiapoptotic BCL-2 family members. *Cancer Cell* 9:351-365.
- s13. Chipuk, J.E., et al. 2004. Direct activation of Bax by p53 mediates mitochondrial membrane permeabilization and apoptosis. *Science*. **303**:1010–1014.
- s14. Krebs, J.F., et al. 1999. Activation of membrane-associated procaspase-3 is regulated by Bcl-2. *J. Cell Biol.* **144**:915–926.
